# Supplementary material
Source: PubMed Central journal article supplement (PMC7643345)
Supplement: es0c02606_si_001.pdf [file es0c02606_si_001.pdf]

Supporting Information

**Ingestion of fecal bacteria along multiple pathways by young children in rural Bangladesh participating in a cluster-randomized trial of water, sanitation and hygiene interventions (WASH Benefits)**

Laura H. Kwong<sup>1,\*</sup>, Ayse Ercumen<sup>2</sup>, Amy J. Pickering<sup>3</sup>, Joanne E. Arsenault<sup>4</sup>, Mahfuza Islam<sup>5</sup>, Sarker M Parvez<sup>5</sup>, Leanne Unicomb<sup>5</sup>, Mahbubur Rahman<sup>5</sup>, Jennifer Davis<sup>1,6</sup>, and Stephen P. Luby<sup>1</sup>

<sup>1</sup> Woods Institute for the Environment, Stanford University, Stanford, California, USA

<sup>2</sup> Department of Forestry and Environmental Resources, North Carolina State University, Raleigh, North Carolina, USA

<sup>3</sup> Department of Civil and Environmental Engineering, Tufts University, Medford, MA

<sup>4</sup> Program in International Community Nutrition, University of California, Davis, California, USA

<sup>5</sup> International Centre for Diarrhoeal Disease Research, Bangladesh, Dhaka, Bangladesh

<sup>6</sup> Department of Civil and Environmental Engineering, Stanford University, Stanford, California, USA

\* Corresponding author:

Laura H Kwong ([lakwong@stanford.edu](mailto:lakwong@stanford.edu))

Y2E2 Room 276, 473 Via Ortega, Stanford, California, USA 94305

Number of pages: 6

Number of tables: 3

Number of figures: 1

## Table of Contents

|                                                                                                                                                                                                |    |
|------------------------------------------------------------------------------------------------------------------------------------------------------------------------------------------------|----|
| Table S1. Input parameters and associated distributions for modeling fecal ingestion of rates of the fecal indicator bacteria, <i>E. coli</i> , among young children in rural Bangladesh ..... | S1 |
| Table S2. Modeled log <sub>10</sub> <i>E. coli</i> MPN ingestion/day among children in the WASH Benefits Bangladesh control and WSH arms .....                                                 | S3 |
| Figure S1. Modeled fecal bacteria ingestion by young children in rural Bangladesh .....                                                                                                        | S4 |
| Table S3. Sensitivity of fecal bacteria ingested by Bangladeshi children to model input parameters.....                                                                                        | S5 |
| References.....                                                                                                                                                                                | S7 |

Table S1. Input parameters and associated distributions for modeling fecal ingestion of rates of the fecal indicator bacteria, *E. coli*, among young children in rural Bangladesh

| Parameter symbol                   | Parameter                                                                         | Units       | Age group    | Form      | v1; v2    | Min  | Mean    | Median | Max      | Reference      |
|------------------------------------|-----------------------------------------------------------------------------------|-------------|--------------|-----------|-----------|------|---------|--------|----------|----------------|
| <i>HMTE</i>                        | Hand-to-mouth transfer efficiency                                                 | —           | NA           | beta      | 5.20; 2.6 | 0.11 | 0.67    | 0.69   | 0.99     | <sup>1</sup>   |
| <i>PTE</i>                         | Peri-oral transfer efficiency from the hand to the lips to the mouth              | —           | NA           | beta      | 5.20; 2.6 | 0.00 | 0.30    | 0.28   | 0.93     | <sup>2</sup>   |
| <i>EC.hand<sub>c,4</sub></i>       | <i>E. coli</i> concentration on child's hand                                      | MPN/hand    | 6 months     | empirical |           | 1.25 | 87.08   | 1.25   | 6050.00  | <sup>3,4</sup> |
| <i>EC.hand<sub>c,9</sub></i>       | <i>E. coli</i> concentration on child's hand                                      | MPN/hand    | 6-11 months  | empirical |           | 0.25 | 1816.95 | 10.25  | 24999.99 | <sup>3,4</sup> |
| <i>EC.hand<sub>c,18</sub></i>      | <i>E. coli</i> concentration on child's hand                                      | MPN/hand    | 12-23 months | empirical |           | 0.25 | 3518.12 | 425.00 | 24999.99 | <sup>3,4</sup> |
| <i>EC.hand<sub>c,30</sub></i>      | <i>E. coli</i> concentration on child's hand                                      | MPN/hand    | 24-35 months | empirical |           | 0.25 | 1685.54 | 215.91 | 24999.99 | <sup>3,4</sup> |
| <i>HM.nd<sub>c,4</sub></i>         | Frequency of child's hand-to-mouth contact while not eating [non-dietary]         | times/hr    | 6 months     | empirical |           | 2.26 | 17.60   | 11.70  | 59.13    | This study     |
| <i>HM.nd<sub>c,9</sub></i>         | Frequency of child's hand-to-mouth contact while not eating [non-dietary]         | times/hr    | 6-11 months  | empirical |           | 0.85 | 13.04   | 10.23  | 45.57    | <sup>5,6</sup> |
| <i>HM.nd<sub>c,18</sub></i>        | Frequency of child's hand-to-mouth contact while not eating [non-dietary]         | times/hr    | 12-23 months | empirical |           | 0.00 | 10.58   | 10.15  | 31.36    | <sup>5,6</sup> |
| <i>HM.nd<sub>c,30</sub></i>        | Frequency of child's hand-to-mouth contact while not eating [non-dietary]         | times/hr    | 24-35 months | empirical |           | 0.49 | 11.70   | 8.75   | 36.29    | <sup>5,6</sup> |
| <i>HM.d.episode<sub>c,4</sub></i>  | Frequency of episodes when child feeds self by hand [dietary episodes]            | episodes/hr | 6 months     | empirical |           | 0.00 | 0.01    | 0.00   | 0.25     | <sup>5,6</sup> |
| <i>HM.d.episode<sub>c,9</sub></i>  | Frequency of episodes when child feeds self by hand [dietary episodes]            | episodes/hr | 6-11 months  | empirical |           | 0.00 | 0.17    | 0.00   | 5.23     | <sup>5,6</sup> |
| <i>HM.d.episode<sub>c,18</sub></i> | Frequency of episodes when child feeds self by hand [dietary episodes]            | episodes/hr | 12-23 months | empirical |           | 0.00 | 1.58    | 0.48   | 6.36     | <sup>5,6</sup> |
| <i>HM.d.episode<sub>c,30</sub></i> | Frequency of episodes when child feeds self by hand [dietary episodes]            | episodes/hr | 24-35 months | empirical |           | 0.66 | 2.72    | 2.57   | 5.15     | <sup>5,6</sup> |
| <i>HM.o<sub>c</sub></i>            | Fraction of child's hand-to-mouth contacts that are oral                          | —           | NA           | empirical |           | 0.00 | 0.50    | 0.58   | 0.89     | <sup>1</sup>   |
| <i>HF.o<sub>c</sub></i>            | Fraction of child's hand that contacts the mouth in an oral hand-to-mouth contact | —           | NA           | empirical |           | 0.06 | 0.19    | 0.19   | 0.63     | <sup>1</sup>   |
| <i>HF.po<sub>c</sub></i>           | Fraction of child's hand that contacts the mouth in a peri-oral contact           | —           | NA           | empirical |           | 0.01 | 0.02    | 0.02   | 0.05     | <sup>1</sup>   |
| <i>EC.hand<sub>m,4</sub></i>       | <i>E. coli</i> concentration on caregiver's hand                                  | MPN/hand    | 6 months     | empirical |           | 1.25 | 104.99  | 1.25   | 6050.00  | <sup>3,4</sup> |
| <i>EC.hand<sub>m,9</sub></i>       | <i>E. coli</i> concentration on caregiver's hand                                  | MPN/hand    | 6-11 months  | empirical |           | 0.25 | 1890.41 | 10.25  | 24999.99 | <sup>3,4</sup> |
| <i>EC.hand<sub>m,18</sub></i>      | <i>E. coli</i> concentration on caregiver's hand                                  | MPN/hand    | 12-23 months | empirical |           | 0.25 | 3542.16 | 425.00 | 24999.99 | <sup>3,4</sup> |
| <i>EC.hand<sub>m,30</sub></i>      | <i>E. coli</i> concentration on caregiver's hand                                  | MPN/hand    | 24-35 months | empirical |           | 0.25 | 1745.61 | 227.27 | 24999.99 | <sup>3,4</sup> |
| <i>HM.nd<sub>m,4</sub></i>         | Frequency of non-dietary hand contacts between caregiver's hand and child's mouth | times/hr    | 6 months     | empirical |           | 0.19 | 2.61    | 2.01   | 9.42     | <sup>5,6</sup> |
| <i>HM.nd<sub>m,9</sub></i>         | Frequency of non-dietary contacts between caregiver's hand and child's mouth      | times/hr    | 6-11 months  | empirical |           | 0.13 | 1.88    | 1.08   | 10.36    | <sup>5,6</sup> |
| <i>HM.nd<sub>m,18</sub></i>        | Frequency of non-dietary contacts between caregiver's hand and child's mouth      | times/hr    | 12-23 months | empirical |           | 0.00 | 0.95    | 0.39   | 7.15     | <sup>5,6</sup> |
| <i>HM.nd<sub>m,30</sub></i>        | Frequency of non-dietary contacts between caregiver's hand and child's mouth      | times/hr    | 24-35 months | empirical |           | 0.00 | 0.48    | 0.00   | 2.17     | <sup>5,6</sup> |
| <i>HM.d.episode<sub>m,4</sub></i>  | Frequency of dietary episodes when caregiver feeds child by hand                  | episodes/hr | 6 months     | empirical |           | 0.00 | 0.07    | 0.00   | 1.50     | <sup>5,6</sup> |
| <i>HM.d.episode<sub>m,9</sub></i>  | Frequency of dietary episodes when caregiver feeds child by hand                  | episodes/hr | 6-11 months  | empirical |           | 0.00 | 0.23    | 0.00   | 3.85     | <sup>5,6</sup> |
| <i>HM.d.episode<sub>m,18</sub></i> | Frequency of dietary episodes when caregiver feeds child by hand                  | episodes/hr | 12-23 months | empirical |           | 0.00 | 0.72    | 0.21   | 4.97     | <sup>5,6</sup> |
| <i>HM.d.episode<sub>m,30</sub></i> | Frequency of dietary episodes when caregiver feeds child by hand                  | episodes/hr | 24-35 months | empirical |           | 0.00 | 0.72    | 0.46   | 3.76     | <sup>5,6</sup> |
| <i>HF.o<sub>m,4</sub></i>          | Fraction of caregiver's hand mouthed in an oral contact                           | —           | 6 months     | empirical |           | 0.01 | 0.06    | 0.06   | 0.25     | <sup>1</sup>   |
| <i>HF.o<sub>m,9</sub></i>          | Fraction of caregiver's hand mouthed in an oral contact                           | —           | 6-11 months  | empirical |           | 0.01 | 0.06    | 0.06   | 0.28     | <sup>1</sup>   |
| <i>HF.o<sub>m,18</sub></i>         | Fraction of caregiver's hand mouthed in an oral contact                           | —           | 12-23 months | empirical |           | 0.02 | 0.07    | 0.07   | 0.34     | <sup>1</sup>   |
| <i>HF.o<sub>m,30</sub></i>         | Fraction of caregiver's hand mouthed in an oral contact                           | —           | 24-35 months | empirical |           | 0.02 | 0.08    | 0.07   | 0.36     | <sup>1</sup>   |
| <i>HF.po<sub>m,4</sub></i>         | Fraction of caregiver's hand mouthed in a peri-oral contact                       | —           | 6 months     | empirical |           | 0.00 | 0.01    | 0.00   | 0.02     | <sup>1</sup>   |
| <i>HF.po<sub>m,9</sub></i>         | Fraction of caregiver's hand mouthed in a peri-oral contact                       | —           | 6-11 months  | empirical |           | 0.00 | 0.01    | 0.00   | 0.02     | <sup>1</sup>   |

|                                |                                                             |                     |              |             |             |       |           |          |             |                |
|--------------------------------|-------------------------------------------------------------|---------------------|--------------|-------------|-------------|-------|-----------|----------|-------------|----------------|
| <i>HF.po<sub>m,18</sub></i>    | Fraction of caregiver's hand mouthed in a peri-oral contact | —                   | 12-23 months | empirical   |             | 0.00  | 0.01      | 0.01     | 0.02        | <sup>1</sup>   |
| <i>HF.po<sub>m,30</sub></i>    | Fraction of caregiver's hand mouthed in a peri-oral contact | —                   | 24-35 months | empirical   |             | 0.00  | 0.01      | 0.01     | 0.03        | <sup>1</sup>   |
| <i>EC.obj</i>                  | <i>E. coli</i> concentration on object                      | MPN/cm <sup>2</sup> | NA           | empirical   |             | 0.00  | 5.12      | 0.08     | 154.19      | <sup>3,4</sup> |
| <i>OM<sub>c,4</sub></i>        | Frequency of child's object-to-mouth contacts               | times/hr            | 6 months     | empirical   |             | 0.25  | 17.75     | 8.17     | 77.41       | <sup>5,6</sup> |
| <i>OM<sub>c,9</sub></i>        | Frequency of child's object-to-mouth contacts               | times/hr            | 6-11 months  | empirical   |             | 0.33  | 19.01     | 12.67    | 115.87      | <sup>5,6</sup> |
| <i>OM<sub>c,18</sub></i>       | Frequency of child's object-to-mouth contacts               | times/hr            | 12-23 months | empirical   |             | 0.34  | 17.40     | 11.16    | 74.10       | <sup>5,6</sup> |
| <i>OM<sub>c,30</sub></i>       | Frequency of child's object-to-mouth contacts               | times/hr            | 24-35 months | empirical   |             | 1.46  | 24.07     | 18.83    | 58.70       | <sup>5,6</sup> |
| <i>SAM.obj</i>                 | Surface area of object mouthed                              | cm <sup>2</sup>     | NA           | exponential | 0.11        | 1.00  | 9.90      | 7.33     | 49.60       | <sup>7</sup>   |
| <i>EC.food<sub>c,4</sub></i>   | <i>E. coli</i> concentration in food fed to children        | MPN/dry g           | 6 months     | empirical   |             | 0.06  | 60.29     | 0.68     | 1055.63     | <sup>3,4</sup> |
| <i>EC.food<sub>c,9</sub></i>   | <i>E. coli</i> concentration in food fed to children        | MPN/dry g           | 6-11 months  | empirical   |             | 0.07  | 114.24    | 2.05     | 952.93      | <sup>3,4</sup> |
| <i>EC.food<sub>c,18</sub></i>  | <i>E. coli</i> concentration in food fed to children        | MPN/dry g           | 12-23 months | empirical   |             | 0.50  | 24467.01  | 18.32    | 493075.62   | <sup>3,4</sup> |
| <i>EC.food<sub>c,30</sub></i>  | <i>E. coli</i> concentration in food fed to children        | MPN/dry g           | 24-35 months | empirical   |             | 0.50  | 23652.03  | 18.32    | 493075.62   | <sup>3,4</sup> |
| <i>F<sub>c,4</sub></i>         | Mass of food consumed                                       | dry g/day           | 6 months     | empirical   |             | 0.00  | 1.93      | 0.00     | 12.91       | This study     |
| <i>F<sub>c,9</sub></i>         | Mass of food consumed                                       | dry g/day           | 6-11 months  | empirical   |             | 0.03  | 30.90     | 30.80    | 74.82       | <sup>8,9</sup> |
| <i>F<sub>c,18</sub></i>        | Mass of food consumed                                       | dry g/day           | 12-23 months | empirical   |             | 0.39  | 102.43    | 101.97   | 258.46      | This study     |
| <i>F<sub>c,30</sub></i>        | Mass of food consumed                                       | dry g/day           | 24-35 months | empirical   |             | 0.97  | 173.46    | 173.33   | 381.40      | <sup>9</sup>   |
| <i>EC.water<sub>c,4</sub></i>  | <i>E. coli</i> concentration in stored water                | MPN /100 mL         | 6 months     | empirical   |             | 0.50  | 211.07    | 7.40     | 2420.00     | <sup>3,4</sup> |
| <i>EC.water<sub>c,9</sub></i>  | <i>E. coli</i> concentration in stored water                | MPN /100 mL         | 6-11 months  | empirical   |             | 0.50  | 140.92    | 9.60     | 2420.00     | <sup>3,4</sup> |
| <i>EC.water<sub>c,18</sub></i> | <i>E. coli</i> concentration in stored water                | MPN /100 mL         | 12-23 months | empirical   |             | 0.50  | 63.79     | 19.00    | 200.00      | <sup>3,4</sup> |
| <i>EC.water<sub>c,30</sub></i> | <i>E. coli</i> concentration in stored water                | MPN /100 mL         | 24-35 months | empirical   |             | 0.50  | 70.78     | 28.00    | 200.00      | <sup>3,4</sup> |
| <i>W<sub>c,4</sub></i>         | Volume of water consumed                                    | 100 mL/day          | 6 months     | empirical   |             | 0.00  | 2.62      | 0.00     | 6.25        | This study     |
| <i>W<sub>c,9</sub></i>         | Volume of water consumed                                    | 100 mL/day          | 6-11 months  | empirical   |             | 6.13  | 6.47      | 6.47     | 6.88        | This study     |
| <i>W<sub>c,18</sub></i>        | Volume of water consumed                                    | 100 mL/day          | 12-23 months | empirical   |             | 6.60  | 7.12      | 7.11     | 7.67        | This study     |
| <i>W<sub>c,30</sub></i>        | Volume of water consumed                                    | 100 mL/day          | 24-35 months | empirical   |             | 7.71  | 8.18      | 8.18     | 8.70        | This study     |
| <i>EC.soil</i>                 | <i>E. coli</i> concentration in soil                        | MPN/dry g           | NA           | empirical   |             | 0.44  | 682.90    | 177.81   | 2403.18     | <sup>4</sup>   |
| <i>SM<sub>c,4</sub></i>        | Frequency of direct soil mouthing                           | times/day           | 6 months     | empirical   |             | 0.00  | 1.03      | 0.00     | 6.24        | <sup>5,6</sup> |
| <i>SM<sub>c,9</sub></i>        | Frequency of direct soil mouthing                           | times/day           | 6-11 months  | empirical   |             | 0.00  | 6.76      | 2.38     | 64.62       | <sup>5,6</sup> |
| <i>SM<sub>c,18</sub></i>       | Frequency of direct soil mouthing                           | times/day           | 12-23 months | empirical   |             | 0.00  | 5.08      | 2.81     | 26.01       | <sup>5,6</sup> |
| <i>SM<sub>c,30</sub></i>       | Frequency of direct soil mouthing                           | times/day           | 24-35 months | empirical   |             | 0.00  | 0.30      | 0.00     | 7.00        | <sup>5,6</sup> |
| <i>SW.DI</i>                   | Mass of soil ingested per direct ingestion event            | dry mg              | NA           | beta        | 5.30; 158.6 | 7.04  | 31.78     | 30.06    | 69.78       | <sup>1</sup>   |
| <i>EC.feces</i>                | <i>E. coli</i> concentration in animal feces                | MPN/wet – weight mg | NA           | empirical   |             | 53.70 | 375931.65 | 47134.22 | 81507621.01 | This study     |
| <i>FM<sub>c,4</sub></i>        | Frequency of direct feces mouthing                          | times/day           | 6 months     | empirical   |             | 0.00  | 0.00      | 0.00     | 0.00        | <sup>5,6</sup> |
| <i>FM<sub>c,9</sub></i>        | Frequency of direct feces mouthing                          | times/day           | 6-11 months  | empirical   |             | 0.00  | 0.51      | 0.00     | 12.66       | <sup>5,6</sup> |
| <i>FM<sub>c,18</sub></i>       | Frequency of direct feces mouthing                          | times/day           | 12-23 months | empirical   |             | 0.00  | 0.00      | 0.00     | 0.00        | <sup>5,6</sup> |
| <i>FM<sub>c,30</sub></i>       | Frequency of direct feces mouthing                          | times/day           | 24-35 months | empirical   |             | 0.00  | 0.00      | 0.00     | 0.00        | <sup>5,6</sup> |
| <i>MC.feces</i>                | Moisture content of feces                                   | —                   | NA           | empirical   |             | 0.06  | 0.57      | 0.57     | 0.94        | This study     |
| <i>FW.DI</i>                   | Mass of feces ingested per direct ingestion event           | dry mg              | NA           | empirical   |             | 7.04  | 31.88     | 30.18    | 69.72       | This study     |
| <i>awake<sub>c,4</sub></i>     | Duration child is awake                                     | hr/day              | 6 months     | normal      | 12.9; 1.3   | 6.20  | 10.40     | 10.39    | 14.60       | <sup>10</sup>  |
| <i>awake<sub>c,9</sub></i>     | Duration child is awake                                     | hr/day              | 6-11 months  | normal      | 12.6; 1.3   | 8.20  | 11.15     | 11.15    | 14.60       | <sup>10</sup>  |
| <i>awake<sub>c,18</sub></i>    | Duration child is awake                                     | hr/day              | 12-23 months | normal      | 12.0; 1.2   | 8.80  | 11.42     | 11.43    | 14.00       | <sup>10</sup>  |
| <i>awake<sub>c,30</sub></i>    | Duration child is awake                                     | hr/day              | 24-35 months | normal      | 12.9; 1.3   | 9.80  | 12.01     | 12.01    | 14.30       | <sup>10</sup>  |

The subscript 'c' refers to children, while the subscript 'm' refers to caregivers. The number after the subscript (*i* in the equations) refers to the child age group: 3–5 months (*i* = 4), 6–11 months (*i* = 9), 12–23 months (*i* = 18), and 24–35 months (*i* = 30). V1 refers to the value of alpha (beta distribution); mean (normal distribution), or lambda (exponential distribution). V2 refers to the value of beta (beta distribution) or standard deviation (normal distribution).

Table S2. Modeled log<sub>10</sub> *E. coli* MPN ingestion/day among children in the WASH Benefits Bangladesh control and WSH arms

| Log <sub>10</sub> <i>E. coli</i> MPN/day |                  |     |                 |                 |                 |      |
|------------------------------------------|------------------|-----|-----------------|-----------------|-----------------|------|
| Arm                                      | Age group        | Min | 25th percentile | 50th percentile | 75th percentile | Max  |
| Control                                  | <6 months old    | 1.4 | 3.1             | 3.6             | 4.3             | 6.2  |
|                                          | 6-11 months old  | 2.7 | 4.2             | 4.7             | 5.2             | 10.2 |
|                                          | 12-23 months old | 3.2 | 4.6             | 5.0             | 5.5             | 8.0  |
|                                          | 24-35 months old | 3.0 | 4.3             | 4.7             | 5.1             | 8.3  |
| WSH                                      | <6 months old    | 1.2 | 3.2             | 3.7             | 4.3             | 6.0  |
|                                          | 6-11 months old  | 2.4 | 4.3             | 4.7             | 5.2             | 10.2 |
|                                          | 12-23 months old | 3.2 | 4.6             | 4.9             | 5.4             | 7.9  |
|                                          | 24-35 months old | 3.1 | 4.3             | 4.6             | 5.0             | 8.1  |

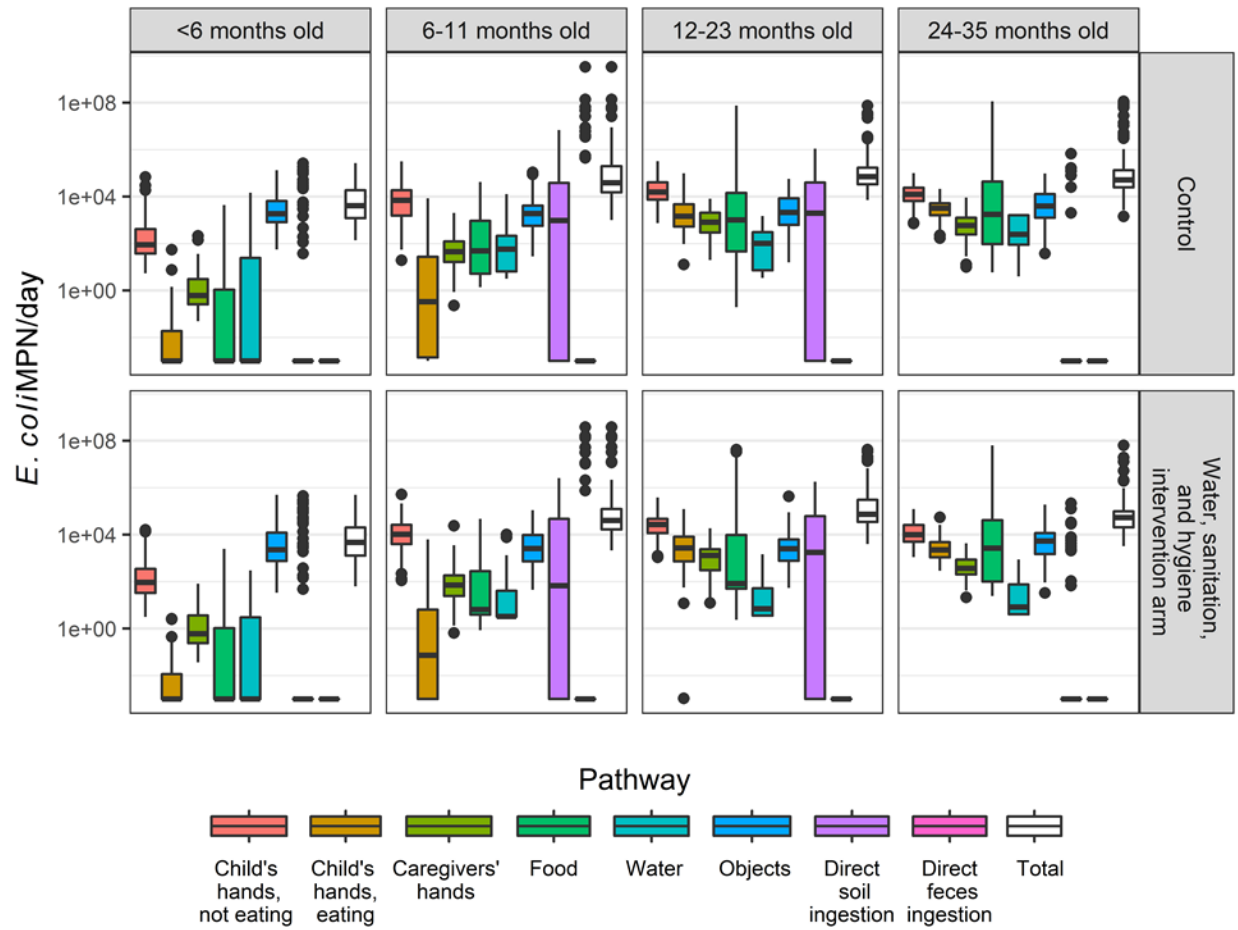

Figure S1. Modeled fecal bacteria ingestion by young children in rural Bangladesh. The median is denoted by the line in the middle of the box, with the bottom of the box marking the 25<sup>th</sup> percentile and the top of the box marking the 75<sup>th</sup> percentile. The whiskers extend past the box to 1.5 times the range between the 25<sup>th</sup> and 75<sup>th</sup> percentile. Outliers are marked with black circles.

Table S3. Sensitivity of fecal bacteria ingested by Bangladeshi children to model input parameters

| Parameter                                                                         | Unit                             | Age group                  | 25th                | 50th                 | 75th                  | Ratio of result using<br>75th percentile to 25th<br>percentile |
|-----------------------------------------------------------------------------------|----------------------------------|----------------------------|---------------------|----------------------|-----------------------|----------------------------------------------------------------|
|                                                                                   |                                  |                            | percentile          | percentile           | percentile            |                                                                |
| Frequency of direct soil ingestion                                                | times/day                        | 6 months                   | 0.00                | 0.00                 | 0.00                  | 1.00                                                           |
| <b><u>Frequency of direct soil ingestion</u></b>                                  | <b><u>times/day</u></b>          | <b><u>6-11 months</u></b>  | <b><u>0.00</u></b>  | <b><u>2.38</u></b>   | <b><u>7.75</u></b>    | <b><u>153.86</u></b>                                           |
| Frequency of direct soil ingestion                                                | times/day                        | 12-23 months               | 0.00                | 2.81                 | 7.28                  | 6.77                                                           |
| Frequency of direct soil ingestion                                                | times/day                        | 24-35 months               | 0.00                | 0.00                 | 0.00                  | 1.00                                                           |
| <i>E. coli</i> concentration in soil                                              | MPN/dry mg                       | 6 months                   | 23.47               | 180.67               | 1365.16               | 1.00                                                           |
| <b><u><i>E. coli</i> concentration in soil</u></b>                                | <b><u>MPN/dry mg</u></b>         | <b><u>6-11 months</u></b>  | <b><u>23.47</u></b> | <b><u>179.13</u></b> | <b><u>1351.16</u></b> | <b><u>49.66</u></b>                                            |
| <b><u><i>E. coli</i> concentration in soil</u></b>                                | <b><u>MPN/dry mg</u></b>         | <b><u>12-23 months</u></b> | <b><u>23.07</u></b> | <b><u>177.81</u></b> | <b><u>1351.16</u></b> | <b><u>13.91</u></b>                                            |
| <i>E. coli</i> concentration in soil                                              | MPN/dry mg                       | 24-35 months               | 23.47               | 180.35               | 1365.16               | 1.00                                                           |
| <b><u><i>E. coli</i> concentration on object</u></b>                              | <b><u>MPN/cm<sup>2</sup></u></b> | <b><u>6 months</u></b>     | <b><u>0.00</u></b>  | <b><u>0.08</u></b>   | <b><u>0.79</u></b>    | <b><u>28.06</u></b>                                            |
| <i>E. coli</i> concentration on object                                            | MPN/cm <sup>2</sup>              | 6-11 months                | 0.00                | 0.08                 | 0.77                  | 1.04                                                           |
| <i>E. coli</i> concentration on object                                            | MPN/cm <sup>2</sup>              | 12-23 months               | 0.01                | 0.08                 | 0.85                  | 1.02                                                           |
| <i>E. coli</i> concentration on object                                            | MPN/cm <sup>2</sup>              | 24-35 months               | 0.01                | 0.08                 | 0.79                  | 1.13                                                           |
| <i>E. coli</i> concentration in food fed to children                              | MPN/dry g                        | 6 months                   | 0.18                | 0.67                 | 12.60                 | 1.00                                                           |
| <i>E. coli</i> concentration in food fed to children                              | MPN/dry g                        | 6-11 months                | 0.17                | 2.05                 | 28.36                 | 1.07                                                           |
| <b><u><i>E. coli</i> concentration in food fed to children</u></b>                | <b><u>MPN/dry g</u></b>          | <b><u>12-23 months</u></b> | <b><u>0.50</u></b>  | <b><u>23.60</u></b>  | <b><u>361.95</u></b>  | <b><u>2.90</u></b>                                             |
| <b><u><i>E. coli</i> concentration in food fed to children</u></b>                | <b><u>MPN/dry g</u></b>          | <b><u>24-35 months</u></b> | <b><u>0.50</u></b>  | <b><u>24.36</u></b>  | <b><u>361.95</u></b>  | <b><u>22.78</u></b>                                            |
| Frequency of child's object-to-mouth contacts                                     | times/hr                         | 6 months                   | 2.35                | 8.17                 | 33.85                 | 6.97                                                           |
| Frequency of child's object-to-mouth contacts                                     | times/hr                         | 6-11 months                | 7.50                | 12.67                | 25.49                 | 1.01                                                           |
| Frequency of child's object-to-mouth contacts                                     | times/hr                         | 12-23 months               | 4.79                | 11.16                | 24.46                 | 1.00                                                           |
| Frequency of child's object-to-mouth contacts                                     | times/hr                         | 24-35 months               | 12.61               | 18.83                | 35.47                 | 1.02                                                           |
| <i>E. coli</i> concentration on child's hand                                      | MPN/hand                         | 6 months                   | 1.25                | 1.25                 | 5.00                  | 1.79                                                           |
| <i>E. coli</i> concentration on child's hand                                      | MPN/hand                         | 6-11 months                | 1.25                | 10.25                | 227.00                | 1.15                                                           |
| <i>E. coli</i> concentration on child's hand                                      | MPN/hand                         | 12-23 months               | 87.50               | 437.50               | 1700.00               | 1.82                                                           |
| <b><u><i>E. coli</i> concentration on child's hand</u></b>                        | <b><u>MPN/hand</u></b>           | <b><u>24-35 months</u></b> | <b><u>57.95</u></b> | <b><u>227.27</u></b> | <b><u>1090.91</u></b> | <b><u>3.08</u></b>                                             |
| <b>Mouthed surface area of object</b>                                             | <b>cm<sup>2</sup></b>            | <b>6 months</b>            | <b>3.73</b>         | <b>7.32</b>          | <b>13.51</b>          | <b>2.54</b>                                                    |
| Mouthed surface area of object                                                    | cm <sup>2</sup>                  | 6-11 months                | 3.77                | 7.47                 | 13.79                 | 1.01                                                           |
| Mouthed surface area of object                                                    | cm <sup>2</sup>                  | 12-23 months               | 3.73                | 7.40                 | 13.75                 | 1.00                                                           |
| Mouthed surface area of object                                                    | cm <sup>2</sup>                  | 24-35 months               | 3.63                | 7.22                 | 13.47                 | 1.02                                                           |
| Mass of soil ingested per direct ingestion                                        | mg wet – weight                  | 6 months                   | 22.38               | 30.30                | 40.13                 | 1.00                                                           |
| Mass of soil ingested per direct ingestion                                        | mg wet – weight                  | 6-11 months                | 22.07               | 30.33                | 40.01                 | 1.79                                                           |
| Mass of soil ingested per direct ingestion                                        | mg wet – weight                  | 12-23 months               | 22.16               | 30.19                | 39.75                 | 1.49                                                           |
| Mass of soil ingested per direct ingestion                                        | mg wet – weight                  | 24-35 months               | 22.15               | 30.25                | 40.38                 | 1.00                                                           |
| Frequency of child's hand-to-mouth contact while not eating [non-dietary]         | times/hr                         | 6 months                   | 4.89                | 11.70                | 31.24                 | 1.70                                                           |
| Frequency of child's hand-to-mouth contact while not eating [non-dietary]         | times/hr                         | 6-11 months                | 4.99                | 10.23                | 18.51                 | 1.01                                                           |
| Frequency of child's hand-to-mouth contact while not eating [non-dietary]         | times/hr                         | 12-23 months               | 5.41                | 10.15                | 13.35                 | 1.15                                                           |
| Frequency of child's hand-to-mouth contact while not eating [non-dietary]         | times/hr                         | 24-35 months               | 6.13                | 8.75                 | 16.61                 | 1.34                                                           |
| <b>Volume of water consumed</b>                                                   | <b>100 mL/day</b>                | <b>6 months</b>            | <b>0.00</b>         | <b>0.00</b>          | <b>5.94</b>           | <b>2.00</b>                                                    |
| Volume of water consumed                                                          | 100 mL/day                       | 6-11 months                | 6.40                | 6.48                 | 6.55                  | 1.00                                                           |
| Volume of water consumed                                                          | 100 mL/day                       | 12-23 months               | 7.02                | 7.12                 | 7.22                  | 1.00                                                           |
| Volume of water consumed                                                          | 100 mL/day                       | 24-35 months               | 8.09                | 8.18                 | 8.27                  | 1.00                                                           |
| Hand-to-mouth transfer efficiency                                                 | —                                | 6 months                   | 0.56                | 0.69                 | 0.79                  | 1.41                                                           |
| Hand-to-mouth transfer efficiency                                                 | —                                | 6-11 months                | 0.56                | 0.69                 | 0.79                  | 1.00                                                           |
| Hand-to-mouth transfer efficiency                                                 | —                                | 12-23 months               | 0.56                | 0.69                 | 0.79                  | 1.07                                                           |
| Hand-to-mouth transfer efficiency                                                 | —                                | 24-35 months               | 0.56                | 0.69                 | 0.79                  | 1.13                                                           |
| Fraction of child's hand-to-mouth contacts that are oral                          | —                                | 6 months                   | 0.36                | 0.58                 | 0.73                  | 1.18                                                           |
| Fraction of child's hand-to-mouth contacts that are oral                          | —                                | 6-11 months                | 0.36                | 0.58                 | 0.73                  | 1.00                                                           |
| Fraction of child's hand-to-mouth contacts that are oral                          | —                                | 12-23 months               | 0.36                | 0.58                 | 0.73                  | 1.12                                                           |
| Fraction of child's hand-to-mouth contacts that are oral                          | —                                | 24-35 months               | 0.36                | 0.58                 | 0.73                  | 1.24                                                           |
| Fraction of child's hand that contacts the mouth in an oral hand-to-mouth contact | —                                | 6 months                   | 0.13                | 0.19                 | 0.24                  | 1.16                                                           |
| Fraction of child's hand that contacts the mouth in an oral hand-to-mouth contact | —                                | 6-11 months                | 0.13                | 0.19                 | 0.24                  | 1.00                                                           |

|                                                                                   |            |              |        |        |        |      |
|-----------------------------------------------------------------------------------|------------|--------------|--------|--------|--------|------|
| Fraction of child's hand that contacts the mouth in an oral hand-to-mouth contact | —          | 12-23 months | 0.13   | 0.19   | 0.24   | 1.11 |
| Fraction of child's hand that contacts the mouth in an oral hand-to-mouth contact | —          | 24-35 months | 0.13   | 0.19   | 0.24   | 1.22 |
| Mass of food consumed                                                             | dry g/day  | 6 months     | 0.00   | 0.00   | 3.49   | 1.05 |
| Mass of food consumed                                                             | dry g/day  | 6-11 months  | 23.36  | 30.55  | 38.20  | 1.00 |
| Mass of food consumed                                                             | dry g/day  | 12-23 months | 78.98  | 102.50 | 126.77 | 1.05 |
| Mass of food consumed                                                             | dry g/day  | 24-35 months | 132.53 | 173.09 | 214.80 | 1.33 |
| Duration child is awake                                                           | hr/day     | 6 months     | 9.05   | 10.39  | 11.76  | 1.30 |
| Duration child is awake                                                           | hr/day     | 6-11 months  | 10.29  | 11.15  | 12.01  | 1.00 |
| Duration child is awake                                                           | hr/day     | 12-23 months | 10.60  | 11.43  | 12.26  | 1.03 |
| Duration child is awake                                                           | hr/day     | 24-35 months | 11.25  | 12.01  | 12.75  | 1.05 |
| <i>E. coli</i> concentration in stored water                                      | MPN/100 mL | 6 months     | 1.00   | 7.50   | 63.10  | 1.00 |
| <i>E. coli</i> concentration in stored water                                      | MPN/100 mL | 6-11 months  | 1.00   | 9.60   | 48.20  | 1.02 |
| <i>E. coli</i> concentration in stored water                                      | MPN/100 mL | 12-23 months | 3.00   | 19.00  | 123.00 | 1.04 |
| <i>E. coli</i> concentration in stored water                                      | MPN/100 mL | 24-35 months | 8.00   | 30.00  | 171.00 | 1.20 |

Ratios in bold and underlined are above 10; the model is extremely sensitive to changes in these parameters. Ratios equal to 2 and less than 10 are bold only; the model is very sensitive to changes in these parameters.

## References

- (1) Kwong, L. H.; Ercumen, A.; Pickering, A. J.; Unicomb, L.; Davis, J.; Leckie, J. O.; Luby, S. P. Soil Ingestion among Young Children in Rural Bangladesh. *J. Expo. Sci. Environ. Epidemiol.* **2019**, *xx* (xx), xx. <https://doi.org/10.1038/s41370-019-0177-7>.
- (2) Christopher, Y.; Semple, S.; Hughson, G.; Cherrie, J. *Inadvertent Ingestion Exposure in the Workplace*; RR551; Institute of Occupational Medicine: Edinburgh, UK, 2007; p 196.
- (3) Ercumen, A.; Mertens, A.; Arnold, B. F.; Benjamin-Chung, J.; Hubbard, A. E.; Ahmed, M. A.; Kabir, M. H.; Rahman Khalil, Md. M.; Kumar, A.; Rahman, Md. S.; Parvez, S. M.; Unicomb, L.; Rahman, M.; Ram, P. K.; Clasen, T.; Luby, S. P.; Colford, J. M. Effects of Single and Combined Water, Sanitation and Handwashing Interventions on Fecal Contamination in the Domestic Environment: A Cluster-Randomized Controlled Trial in Rural Bangladesh. *Environ. Sci. Technol.* **2018**, *52* (21), 12078–12088. <https://doi.org/10.1021/acs.est.8b05153>.
- (4) Ercumen, A.; Pickering, A. J.; Kwong, L. H.; Mertens, A.; Arnold, B. F.; Benjamin-Chung, J.; Hubbard, A. E.; Alam, M.; Sen, D.; Islam, S.; Rahman, Md. Z.; Kullmann, C.; Chase, C.; Ahmed, R.; Parvez, S. M.; Unicomb, L.; Rahman, M.; Ram, P. K.; Clasen, T.; Luby, S. P.; Colford, J. M. Do Sanitation Improvements Reduce Fecal Contamination of Water, Hands, Food, Soil, and Flies? Evidence from a Cluster-Randomized Controlled Trial in Rural Bangladesh. *Environ. Sci. Technol.* **2018**, *52* (21), 12089–12097. <https://doi.org/10.1021/acs.est.8b02988>.
- (5) Kwong, L. H.; Ercumen, A.; Pickering, A. J.; Unicomb, L.; Davis, J.; Luby, S. P. Hand- and Object-Mouthing of Rural Bangladeshi Children 3–18 Months Old. *Int. J. Environ. Res. Public Health* **2016**, *13* (6), 563. <https://doi.org/10.3390/ijerph13060563>.
- (6) Kwong, L. H.; Ercumen, A.; Pickering, A. J.; Unicomb, L.; Davis, J.; Luby, S. P. Age-Related Changes to Environmental Exposure: Variation in the Frequency That Young Children Place Hands and Objects in Their Mouths. *J. Expo. Sci. Environ. Epidemiol.* **2020**, *30*, 205–216. <https://doi.org/10.1038/s41370-019-0115-8>.
- (7) Leckie, J. O.; Naylor, K. A.; Canales, R. A.; Ferguson, A. C.; Cabrera, N. L.; Hurtado, A. L.; Lee, K.; Lin, A. Y.-C.; Ramirez, J. D.; Vieira, V. M. *Quantifying Children's Microlevel Activity Data from Existing Videotapes. Reference No. U2F112OT-RT-99-001182*; Reference No. U2F112OT-RT-99-001182; Stanford University: Stanford, California, 2000.
- (8) Kimmons, J. E.; Dewey, K. G.; Haque, E.; Chakraborty, J.; Osendarp, S. J. M.; Brown, K. H. Low Nutrient Intakes among Infants in Rural Bangladesh Are Attributable to Low Intake and Micronutrient Density of Complementary Foods. *J. Nutr.* **2005**, *135* (3), 444–451. <https://doi.org/10.1093/jn/135.3.444>.
- (9) Arsenault, J. E.; Yakes, E. A.; Hossain, M. B.; Islam, M. M.; Ahmed, T.; Hotz, C.; Lewis, B.; Rahman, A. S.; Jamil, K. M.; Brown, K. H. The Current High Prevalence of Dietary Zinc Inadequacy among Children and Women in Rural Bangladesh Could Be Substantially Ameliorated by Zinc Biofortification of Rice. *J. Nutr.* **2010**, *140* (9), 1683–1690. <https://doi.org/10.3945/jn.110.123059>.
- (10) Galland, B. C.; Taylor, B. J.; Elder, D. E.; Herbison, P. Normal Sleep Patterns in Infants and Children: A Systematic Review of Observational Studies. *Sleep Med. Rev.* **2012**, *16* (3), 213–222. <https://doi.org/10.1016/j.smr.2011.06.001>.
